# Supplementary material for: Google Street View-Derived Neighborhood Characteristics in California Associated with Coronary Heart Disease, Hypertension, Diabetes
Source: Int J Environ Res Public Health. 2021 Oct 3;18(19):10428. doi: 10.3390/ijerph181910428 (PMC8507846; doi:10.3390/ijerph181910428)
Supplement: Supplementary file 1 [file ijerph-18-10428-s001.zip › ijerph-1367890-supplementary.pdf]

## Online Supplemental Materials

**Table S1. Associations between Google Street View-derived built environment characteristics and coronary artery disease, hypertension, and diabetes (N=284,904).**

|                                                                    | <b>Coronary artery disease</b> | <b>Hypertension</b>       | <b>Diabetes</b>           |
|--------------------------------------------------------------------|--------------------------------|---------------------------|---------------------------|
|                                                                    | Prevalence Ratio (95% CI)      | Prevalence Ratio (95% CI) | Prevalence Ratio (95% CI) |
| <i>Characteristic (higher tertiles indicate higher prevalence)</i> |                                |                           |                           |
| Green streets, 3rd tertile                                         | 0.73 (0.70, 0.77)*             | 0.68 (0.65, 0.71)*        | 0.84 (0.80, 0.88)*        |
| Green streets, 2nd tertile                                         | 0.93 (0.88, 0.99)*             | 0.91 (0.87, 0.95)*        | 1.01 (0.96, 1.06)         |
| Visible wires, 3rd tertile                                         | 1.23 (1.16, 1.30)*             | 1.31 (1.24, 1.38)*        | 1.10 (1.04, 1.15)*        |
| Visible wires, 2nd tertile                                         | 1.14 (1.08, 1.20)*             | 1.21 (1.15, 1.28)*        | 1.10 (1.05, 1.16)*        |
| Dilapidated building, 3rd tertile                                  | 1.18 (1.12, 1.25)*             | 1.21 (1.15, 1.28)*        | 1.14 (1.09, 1.20)*        |
| Dilapidated building, 2nd tertile                                  | 1.17 (1.11, 1.23)*             | 1.21 (1.15, 1.26)*        | 1.16 (1.11, 1.21)*        |

Adjusted logistic regression specifying clustering at the census tract level and controlling for the following covariates: age, sex, marital status, race/ethnicity, insurance status, English as preferred language, assignment of a primary care provider, and neighborhood SES index; 1<sup>st</sup> (lowest) tertile of each characteristic is the referent (based on percentage of Google Street View (GSV) images with the characteristic). Missing values for marital status, race/ethnicity, and smoking status were coded as an additional category rather than set to missing in models.

\*p<0.05

**Table S2. Sociodemographic characteristics of the sample by race/ethnicity.**

| <b>Characteristic</b>              | <b>Asian<br/>N=33,103</b> | <b>Black<br/>(N=13,027)</b> | <b>Hispanic/Latino<br/>N=23,442</b> | <b>White<br/>N=125,494</b> |
|------------------------------------|---------------------------|-----------------------------|-------------------------------------|----------------------------|
| Age (Mean, SD)                     | 52.80 (18.73)             | 51.98 (17.09)               | 48.05 (17.52)                       | 55.27 (17.56)              |
| Female                             | 20,621 (62.29)            | 7,623 (58.52)               | 13,793 (58.84)                      | 68,890 (54.90)             |
| Married/SignificantOther Insurance | 19,104 (57.71)            | 3,407 (26.15)               | 10,791 (46.03)                      | 67,907 (54.11)             |
| Private/MedicareAdv                | 18,859 (56.97)            | 4,391 (33.71)               | 10,083 (43.01)                      | 69,385 (55.29)             |
| Medicare                           | 6,979 (21.08)             | 3,486 (26.76)               | 4,446 (18.97)                       | 35,391 (28.20)             |
| Medicaid/Medi-cal                  | 4,153 (12.55)             | 3,973 (30.50)               | 6,894 (29.41)                       | 10,377 (8.27)              |
| Workers' Comp                      | 371 (1.12)                | 173 (1.33)                  | 381 (1.63)                          | 843 (0.67)                 |
| Govt/Tricare                       | 132 (0.40)                | 196 (1.50)                  | 146 (0.62)                          | 789 (0.63)                 |
| Unspecified/Charity                | 2,609 (7.88)              | 808 (6.20)                  | 1,492 (6.36)                        | 8,709 (6.94)               |
| English pref language              | 25,747 (77.78)            | 12,932 (99.27)              | 18,172 (77.52)                      | 122,813 (97.86)            |
| Smoking status                     |                           |                             |                                     |                            |
| Current smoker                     | 1,391 (4.20)              | 2,158 (16.57)               | 1,384 (5.90)                        | 8,292 (6.61)               |
| Former smoker                      | 5,794 (17.50)             | 3,679 (28.24)               | 5,295 (22.59)                       | 36,277 (28.91)             |
| Never smoker                       | 25,918 (78.30)            | 7,190 (55.19)               | 16,763 (71.51)                      | 80,925 (64.49)             |
| Assigned primary care provider     | 29,168 (88.11)            | 10,754 (82.55)              | 16,762 (71.50)                      | 100,261 (79.89)            |
| Coronary Artery Disease            | 2,339 (7.07)              | 1,168 (8.97)                | 1,306 (5.57)                        | 8,339 (6.64)               |
| Hypertension                       | 11,156 (33.70)            | 5,942 (45.61)               | 7,129 (30.41)                       | 31,123 (24.80)             |
| Diabetes Mellitus                  | 5,424 (16.39)             | 2,641 (20.27)               | 4,345 (18.54)                       | 10,900 (8.69)              |
| Neighborhood SES                   |                           |                             |                                     |                            |
| 1st Quintile                       | 1,121 (3.39)              | 2,175 (16.70)               | 4,011 (17.11)                       | 4,720 (3.76)               |
| 2nd Quintile                       | 1,609(4.86)               | 2,110(16.20)                | 3,831(16.34)                        | 10,642(8.48)               |
| 3rd Quintile                       | 4,820(14.56)              | 2,417(18.55)                | 4,835(20.63)                        | 15,957(12.72)              |
| 4th Quintile                       | 8,389(25.34)              | 3,215(24.68)                | 4,812(20.53)                        | 25,564(20.37)              |
| 5th Quintile                       | 17,164(51.85)             | 3,110(23.87)                | 5,953(25.39)                        | 68,611(54.67)              |
| Google Street View indicators      |                           |                             |                                     |                            |
| Green Space                        |                           |                             |                                     |                            |
| 1 <sup>st</sup> Tertile            | 22,042 (66.59)            | 7,099 (54.49)               | 11,652 (49.71)                      | 46,803 (37.30)             |
| 2 <sup>nd</sup> Tertile            | 5,725 (17.29)             | 3,912 (30.03)               | 6,313 (26.93)                       | 26,856 (21.40)             |
| 3 <sup>rd</sup> Tertile            | 5,336 (16.12)             | 2,016 (15.48)               | 5,477 (23.36)                       | 51,835 (41.30)             |
| Visible Wires                      |                           |                             |                                     |                            |
| 1 <sup>st</sup> Tertile            | 7,774 (23.48)             | 2,607 (20.01)               | 5,854 (24.97)                       | 54,132 (43.14)             |
| 2 <sup>nd</sup> Tertile            | 8,540 (25.80)             | 3,961 (30.41)               | 8,375 (35.73)                       | 38,574 (30.74)             |
| 3 <sup>rd</sup> Tertile            | 16,789 (50.72)            | 6,459 (49.58)               | 9,213 (39.30)                       | 32,788 (26.13)             |
| Dilapidated buildings              |                           |                             |                                     |                            |
| 1 <sup>st</sup> Tertile            | 9,428 (28.48)             | 3,997 (30.68)               | 7,845 (33.47)                       | 57,103 (45.50)             |
| 2 <sup>nd</sup> Tertile            | 12,977 (39.20)            | 4,833 (37.10)               | 8,357 (35.65)                       | 37,575 (29.94)             |
| 3 <sup>rd</sup> Tertile            | 10,698 (32.32)            | 4,197 (32.22)               | 7,240 (30.88)                       | 30,816 (24.56)             |

**Table S3. Associations between Google Street View-derived built environment characteristics and coronary artery disease, hypertension, and diabetes by race and ethnicity.**

|                                              | Coronary artery<br>disease   | Hypertension                 | Diabetes                     |
|----------------------------------------------|------------------------------|------------------------------|------------------------------|
|                                              | Prevalence Ratio (95%<br>CI) | Prevalence Ratio (95%<br>CI) | Prevalence Ratio (95%<br>CI) |
| <i>GSV built environment characteristics</i> |                              |                              |                              |
| Among Black patients (N=13,027)              |                              |                              |                              |
| Green streets, 3rd tertile                   | 0.82 (0.67, 1.02)            | 0.77 (0.68, 0.88)*           | 0.92 (0.80, 1.07)            |
| Green streets, 2nd tertile                   | 0.94 (0.82, 1.07)            | 0.97 (0.89, 1.06)            | 0.98 (0.88, 1.09)            |
| Visible wires, 3rd tertile                   | 1.09 (0.92, 1.30)            | 1.07 (0.95, 1.20)            | 0.99 (0.88, 1.12)            |
| Visible wires, 2nd tertile                   | 1.12 (0.93, 1.35)            | 1.01 (0.89, 1.15)            | 1.00 (0.87, 1.15)            |
| Dilapidated building, 3rd tertile            | 0.98 (0.84, 1.14)            | 1.08 (0.97, 1.20)            | 0.96 (0.85, 1.07)            |
| Dilapidated building, 2nd tertile            | 0.98 (0.83, 1.15)            | 1.14 (1.04, 1.26)*           | 1.07 (0.96, 1.19)            |
| Among Hispanic/Latino patients (N=23,442)    |                              |                              |                              |
| Green streets, 3rd tertile                   | 0.89 (0.76, 1.04)            | 0.78 (0.71, 0.85)*           | 0.88 (0.80, 0.97)            |
| Green streets, 2nd tertile                   | 1.13 (0.97, 1.32)            | 0.96 (0.88, 1.04)            | 1.00 (0.92, 1.10)            |
| Visible wires, 3rd tertile                   | 0.97 (0.82, 1.15)            | 1.12 (1.02, 1.23)*           | 1.03 (0.93, 1.14)            |
| Visible wires, 2nd tertile                   | 0.87 (0.74, 1.03)            | 1.04 (0.95, 1.14)            | 1.06 (0.95, 1.17)            |
| Dilapidated building, 3rd tertile            | 1.08 (0.93, 1.27)            | 1.14 (1.05, 1.24)*           | 1.13 (1.02, 1.24)*           |
| Dilapidated building, 2nd tertile            | 1.15 (0.99, 1.34)            | 1.14 (1.05, 1.25)*           | 1.06 (0.97, 1.16)            |
| Among Asian patients (N=33,103)              |                              |                              |                              |
| Green streets, 3rd tertile                   | 0.77 (0.66, 0.90)*           | 0.69 (0.62, 0.77)*           | 0.86 (0.77, 0.96)*           |
| Green streets, 2nd tertile                   | 0.97 (0.85, 1.11)            | 1.00 (0.92, 1.10)            | 1.06 (0.96, 1.18)            |
| Visible wires, 3rd tertile                   | 1.09 (0.95, 1.24)            | 1.19 (1.06, 1.34)*           | 0.98 (0.88, 1.09)            |
| Visible wires, 2nd tertile                   | 1.10 (0.94, 1.27)            | 1.25 (1.12, 1.40)*           | 1.02 (0.91, 1.14)            |
| Dilapidated building, 3rd tertile            | 1.10 (0.98, 1.24)            | 1.07 (0.95, 1.20)            | 1.03 (0.93, 1.15)            |
| Dilapidated building, 2nd tertile            | 1.06 (0.94, 1.19)            | 1.05 (0.96, 1.16)            | 1.04 (0.94, 1.14)            |
| Among White patients (N=125,494)             |                              |                              |                              |
| Green streets, 3rd tertile                   | 0.73 (0.69, 0.78)*           | 0.72 (0.69, 0.76)*           | 0.89 (0.83, 0.95)*           |
| Green streets, 2nd tertile                   | 0.88 (0.81, 0.95)*           | 0.92 (0.87, 0.98)*           | 1.01 (0.95, 1.09)            |
| Visible wires, 3rd tertile                   | 1.29 (1.19, 1.39)*           | 1.27 (1.20, 1.35)*           | 1.12 (1.05, 1.19)*           |
| Visible wires, 2nd tertile                   | 1.14 (1.07, 1.22)*           | 1.20 (1.13, 1.26)*           | 1.07 (1.01, 1.14)*           |
| Dilapidated building, 3rd tertile            | 1.15 (1.05, 1.27)*           | 1.20 (1.13, 1.27)*           | 1.16 (1.09, 1.24)*           |
| Dilapidated building, 2nd tertile            | 1.15 (1.07, 1.24)*           | 1.20 (1.14, 1.27)*           | 1.19 (1.12, 1.26)*           |

Adjusted logistic regression specifying clustering at the census tract level and controlling for the following covariates: age, sex, marital status, race/ethnicity, insurance status, English as preferred language, and assignment of primary care provider, and neighborhood SES quintiles; 1<sup>st</sup> (lowest) tertile of each GSV indicator is the referent. \*p<0.05
